# Supplementary material
Source: PubMed Central journal article supplement (PMC4288885)
Supplement: IAI.02587-14_zii999091041so1.pdf [file IAI.02587-14_zii999091041so1.pdf]

Supplementary Table. Primers used in this study

---

UpF-BamHI: 5'-CGCGGATCCCCTGCAGCCTTAACTTTGC

UpR: 5'-CTTCTCCAGGGCTCATTTGATTAATTGTCCTTTCTC

DownF: 5'-TCAAATGAGCCCTGGAGAAGAAAGCTACATCCAA

DownR-SphI: 5'-CGCGCATGCGGCATGTGGACATCTGATTG

OutsideF: 5'-AAATGGACAAGCCAAAGTGC

OutsideR: 5'-TCACCAAATCTTGACAGC

pmF: 5'-GCAATTGAAGAATTGCTAGCTCGTTTACGTG

pmR: 5'-CACGTAAACGAGCTAGCAATTCTTCAATTGC

del probeF: 5'-GAACTTAGCGAGATTCGTTG

del probeR: 5'-AGTAGCGGATATACACATCC

AceA: 5'-CCCTCTAGAAATTTAGCGTATCCCACTTCG

AceB: 5'-GCTGGATGGCTTTTCTATTGAAAAAATTAT

AceC: 5'-AGAAGGGTGAATAATTTTTTCAATAGAAAA

AceD: 5'-AAAGGATCCTATACATCACTATCGCTACAAG

---
