# Supplementary material
Source: PubMed Central journal article supplement (PMC4288885)
Supplement: IAI.02587-14_zii999091041so2.pdf [file IAI.02587-14_zii999091041so2.pdf]

### Supplemental figure legend.

Supplemental Figure 1. Growth of *E. faecalis* OG1RF (◆), □ *grvR* (■), and *grvR*\* (●) strains in BHI (A) and in BHIS (B) at 37°C. Strains were grown from initial OD600 of 0.05 and samples were taken for OD600 readings at indicated time.

Supplemental Figure 2. Growth of *E. faecalis* OG1RF (◆), □ *grvR* (■), and *grvR*\* (●) strains in BHI at 49°C (A) and in BHI, pH5.5 at 37°C (B). Standard pH of BHI broth is pH7.2 and pH was adjusted with glacial acetic acid.

Supplemental Figure 3. Western blot analysis of *E. faecalis* strains. Surface expression of Ace was determined by western blot analysis as described before (1).

### Reference

1. **Cohen AL, Roh JH, Nallapareddy SR, Hook M, Murray BE.** 2013. Expression of the collagen adhesin *ace* by *Enterococcus faecalis* strain OG1RF is not repressed by Ers but requires the Ers box. *FEMS Microbiol Lett* **344**:18-24.
