# Supplementary material
Source: PubMed Central journal article supplement (PMC4288885)

Supplemental Figure 1

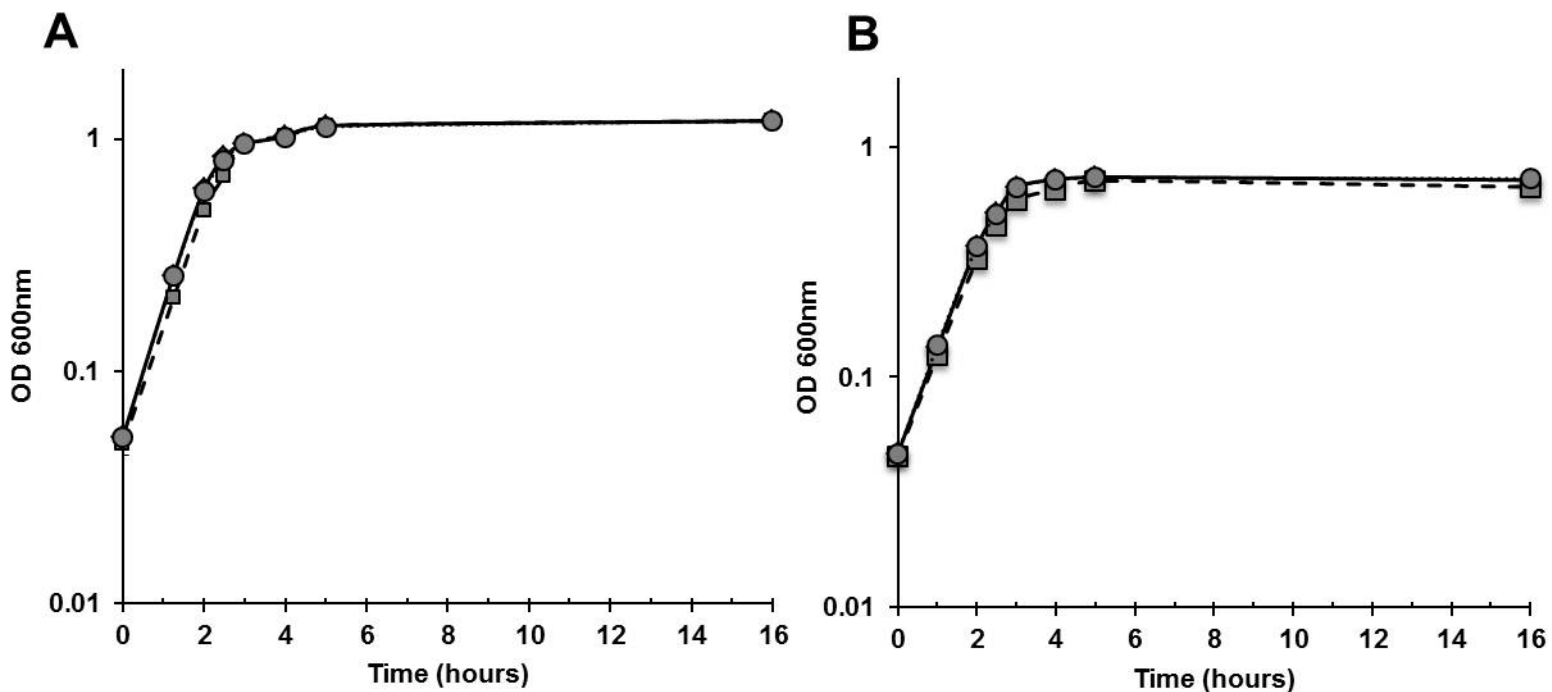

Supplement: IAI.02587-14_zii999091041so3.pdf [file IAI.02587-14_zii999091041so3.pdf]

# Supplemental Figure 2

## A

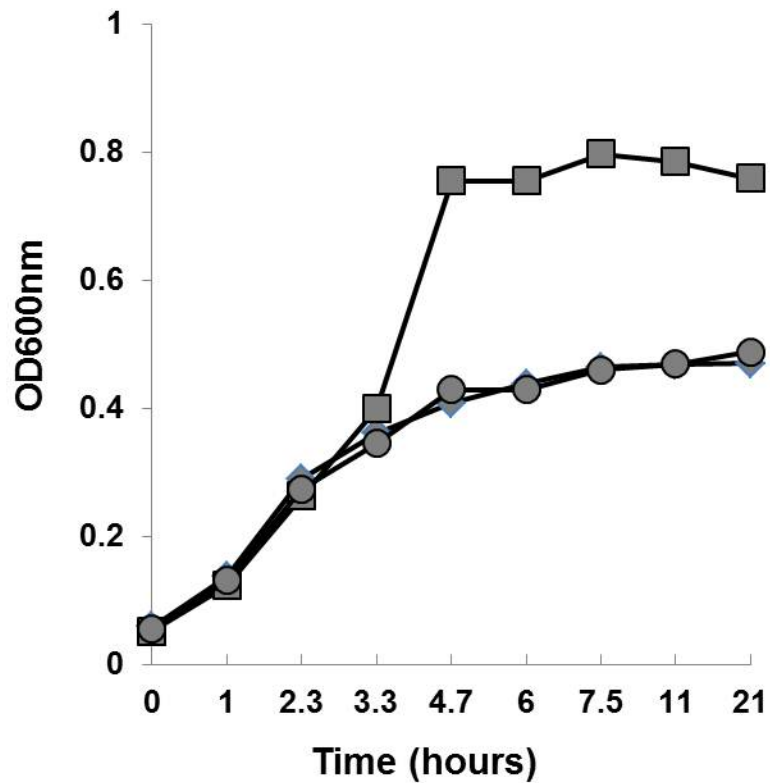

## B

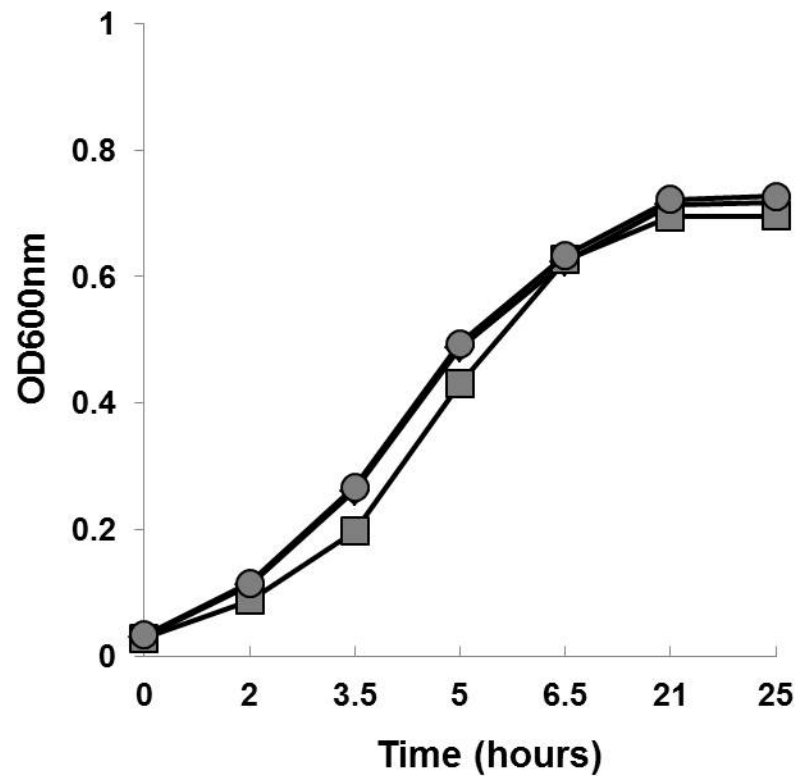

Supplement: IAI.02587-14_zii999091041so4.pdf [file IAI.02587-14_zii999091041so4.pdf]

# Supplemental Figure 3

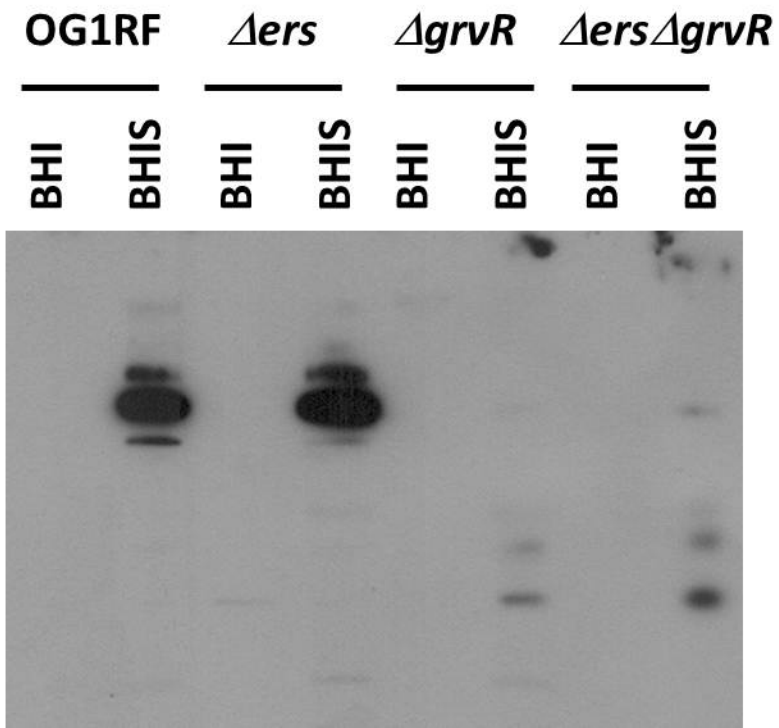

Supplement: IAI.02587-14_zii999091041so5.pdf [file IAI.02587-14_zii999091041so5.pdf]
